CORRECTION

# Correction: Influence of circumferential ankle pressure of shoe collar on the kinematics, dynamic stability, electromyography, and plantar pressure during normal walking

The PLOS ONE Staff

The fifth author's initials appear incorrectly in the citation. The correct citation is: Nasirzadeh A, Yang S-T, Yun J, Yang J, Bae YY, Park J, et al. (2023) Influence of circumferential ankle pressure of shoe collar on the kinematics, dynamic stability, electromyography, and plantar pressure during normal walking. PLOS ONE 18(2): e0281684. <https://doi.org/10.1371/journal.pone.0281684>.

The publisher apologizes for the error.

## Reference

1. Nasirzadeh A, Yang S-T, Yun J, Yang J, Yoon Bae Y, Park J, et al. (2023) Influence of circumferential ankle pressure of shoe collar on the kinematics, dynamic stability, electromyography, and plantar pressure during normal walking. PLOS ONE 18(2): e0281684. <https://doi.org/10.1371/journal.pone.0281684> PMID: 36763568

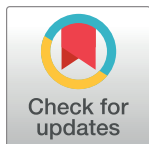

## OPEN ACCESS

**Citation:** The PLOS ONE Staff (2025) Correction: Influence of circumferential ankle pressure of shoe collar on the kinematics, dynamic stability, electromyography, and plantar pressure during normal walking. PLoS ONE 20(1): e0318305. <https://doi.org/10.1371/journal.pone.0318305>

**Published:** January 24, 2025

**Copyright:** © 2025 The PLOS ONE Staff. This is an open access article distributed under the terms of the [Creative Commons Attribution License](https://creativecommons.org/licenses/by/4.0/), which permits unrestricted use, distribution, and reproduction in any medium, provided the original author and source are credited.
